# Supplementary material for: Highly Efficient Biotransformation and Production of Selenium Nanoparticles and Polysaccharides Using Potential Probiotic Bacillus subtilis T5
Source: MDPI journal article supplement (doi:10.3390/metabo12121204), 2022-12-01
Supplement: s1 [file s1]

# Highly efficient biotransformation and production of selenium nanoparticles and polysaccharides using potential probiotic *Bacillus subtilis* T5

Supplementary Materials:

**Table S1.** Color changes of isolates in LA broth containing different concentrations of selenite.

| Bacteria                               | 50 mM | 100 mM | 150 mM | 200 mM |
|----------------------------------------|-------|--------|--------|--------|
| <i>Bacillus licheniformis</i> ES-1     | +++   | ++     | -      | -      |
| <i>Bacillus tequilensis</i> ES-2       | ++    | -      | -      | -      |
| <i>Lysinibacillus fusiformis</i> XF-1  | ++++  | ++++   | ++     | -      |
| <i>Bacillus paralicheniformis</i> XF-4 | ++++  | +++    | ++     | -      |
| <i>Bacillus subtilis</i> T5            | ++++  | ++++   | +++    | +++    |
| <i>Bacillus cereus</i> T4              | ++++  | +++    | +      | -      |
| <i>Bacillus pumilus</i> H4T-9          | +++   | ++     | -      | -      |

- normal; + slightly red; ++ orange; +++ red; ++++ crimson.

**Table S2.** Biochemical characteristics of strain T5 and *Bacillus subtilis*

| Characteristic             | Strain T5 | <i>Bacillus subtilis</i> [1] |
|----------------------------|-----------|------------------------------|
| Oxidase                    | +         | V                            |
| Voges–Proskauer test       | —         | —                            |
| Indole production          | —         | —                            |
| Gelatin liquefaction       | V         | +                            |
| Carbon sources utilization | —         | —                            |
| D-xylose                   | —         | —                            |
| L-arabinose                | —         | —                            |
| D-mannose                  | —         | —                            |
| Sucrose                    | —         | —                            |
| $\alpha$ -D-glucose        | —         | —                            |
| Lactose                    | —         | —                            |
| Arginine decomposition     | —         | —                            |
| Lysine decomposition       | —         | —                            |
| Ornithine decomposition    | —         | —                            |

+ Positive; - Negative; V variable.

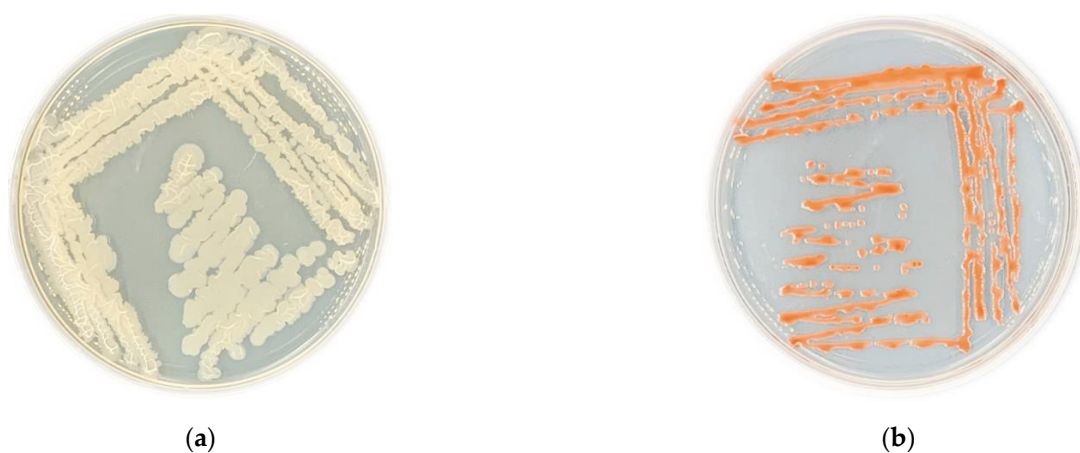

**Figure S1.** Images of cultures of strain T5 grown. (a) In the absence; (b) In the presence of 200 mM selenite.

**References:**

1. N.R.K. J.G. Holt, P.H.A. Sneath, J.T. Staley, S.T. Williams, *Bergey's Manual of Determinative Bacteriology*. 9th ed, Baltimore: Williams and Wilkins, **1994**, pp. 255-60.
